# Supplementary material for: Activation of VIPR1 suppresses hepatocellular carcinoma progression by regulating arginine and pyrimidine metabolism
Source: Int J Biol Sci. 2022 Jul 4;18(11):4341–56. doi: 10.7150/ijbs.71134 (PMC9295067; doi:10.7150/ijbs.71134)
Supplement: Supplementary file 1 — Supplementary materials and methods, figures and tables. [file ijbsv18p4341s1.pdf]

# Supporting Fig. S1A-D

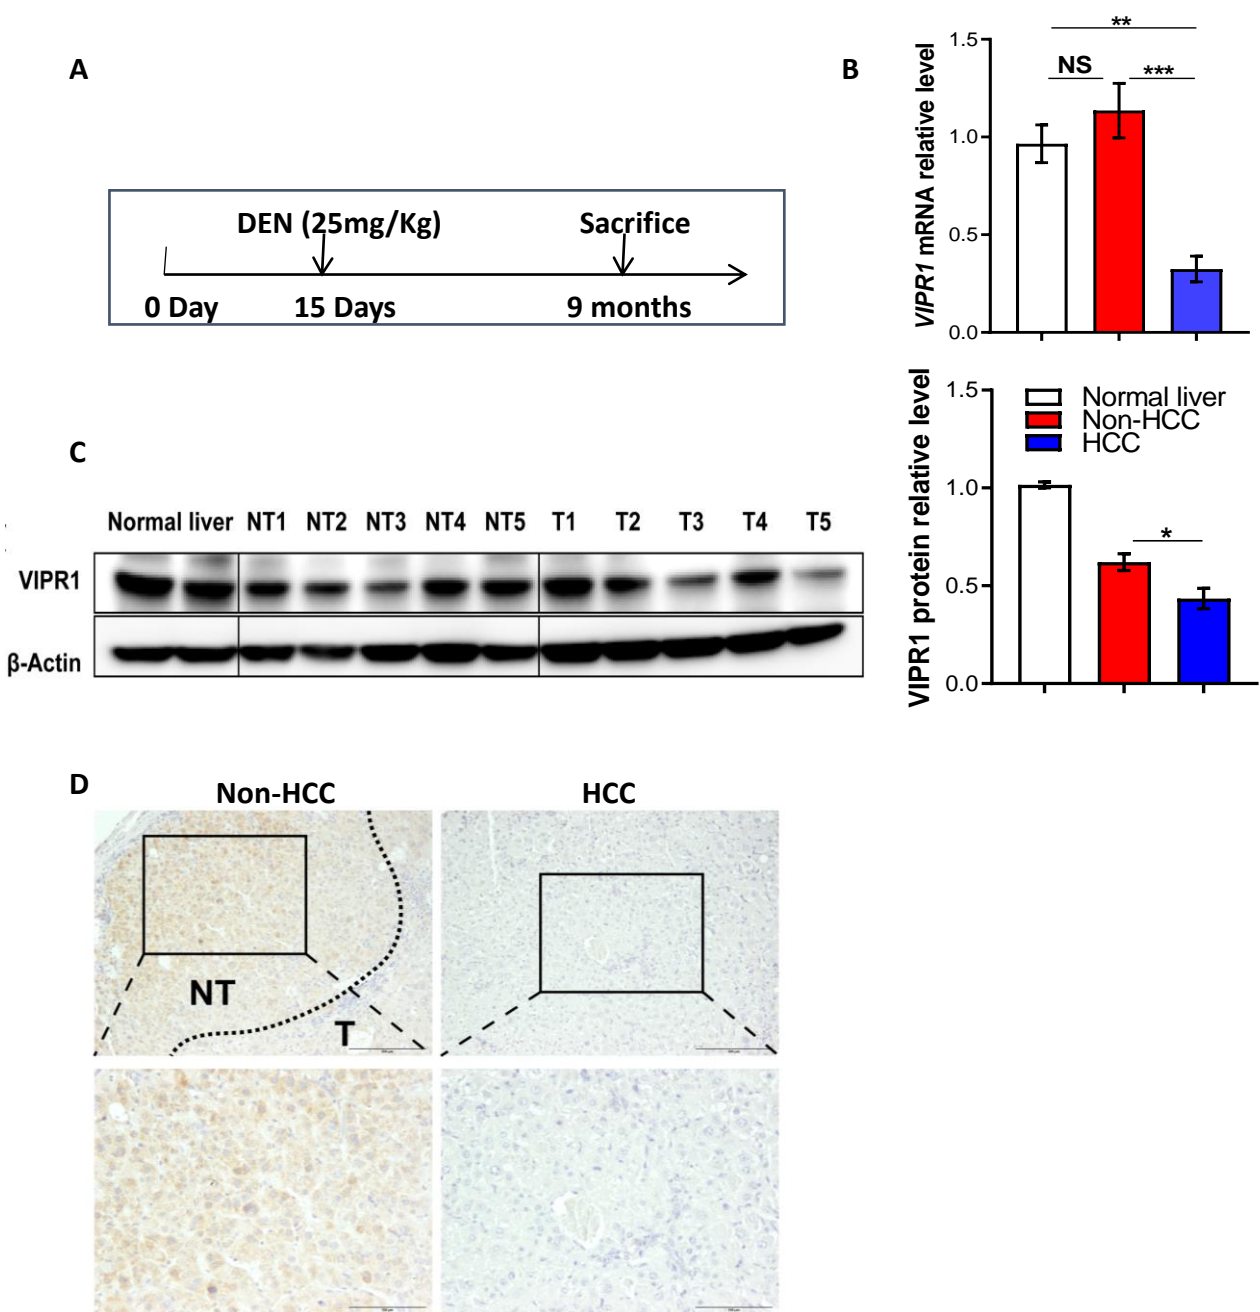

**Supporting Fig. S1A-D. Hepatic VIPR1 expression is downregulated in mouse model of DEN-induced HCC. (A)** Scheme for the establishment of Diethylnitrosamine (DEN)-induced liver cancer model. **(B)** *Vipr1* mRNA level measurement in Normal mouse liver (n=4), adjacent non-HCC tissues (n=8) and HCC tissues (n=8). **(C)** VIPR1 protein level determination of Normal mouse liver (n=2), adjacent non-HCC tissues (n=5) and HCC tissues (n=5). **(D)** Representative micrographs of immunohistochemistry staining of VIPR1 in Non-HCC and HCC regions in DEN-induced cancer model. Values represent means±SEM. \**P*< 0.05, \*\**P*< 0.01, \*\*\**P*< 0.001.

# Supporting Fig. S1E-H

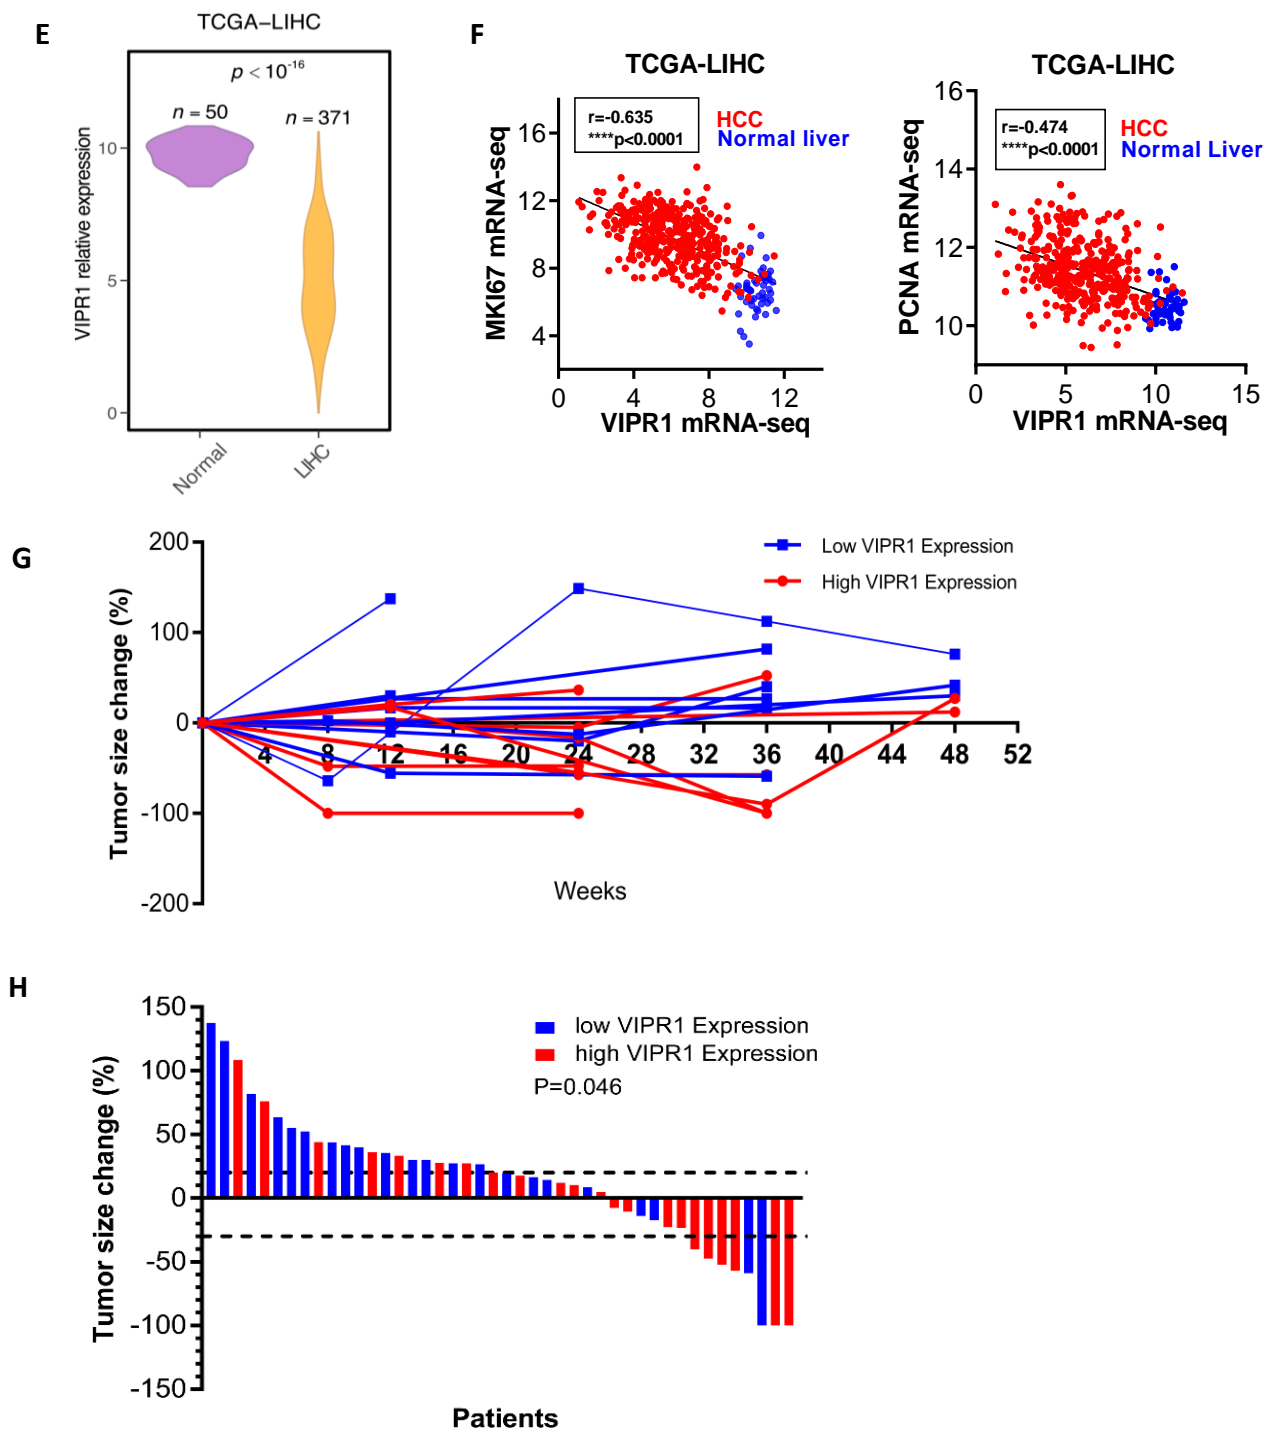

**Supporting Fig. S1E-H. Role of VIPR1 expression in human HCC proliferation, tumor size changes. (E)** *VIPR1* level comparison between normal liver ( $n=50$ ) and HCC tissue ( $n=371$ ) in TCGA-LIHC cohort. **(F)** Pearson's correlation between *VIPR1* and *MKI67* or *PCNA*. **(G)** Spider plot analysis was performed to evaluate recurrence in *VIPR1*<sup>high</sup> ( $n=9$ ) and *VIPR1*<sup>low</sup> ( $n=10$ ) subgroups in 1 year post surgery. The assessment was guided by RECIST version 1.1 criteria. **(H)** Waterfall plot of percentage change from baseline in size of target recurrent tumor lesion in *VIPR1*<sup>high</sup> ( $n=22$ ) and *VIPR1*<sup>low</sup> ( $n=22$ ) subgroups. Abbreviations: ROC: receiver operating characteristic; CI: Confidence Interval; AUC: area under curve. \* $P < 0.05$ .

# Supporting Fig. S2

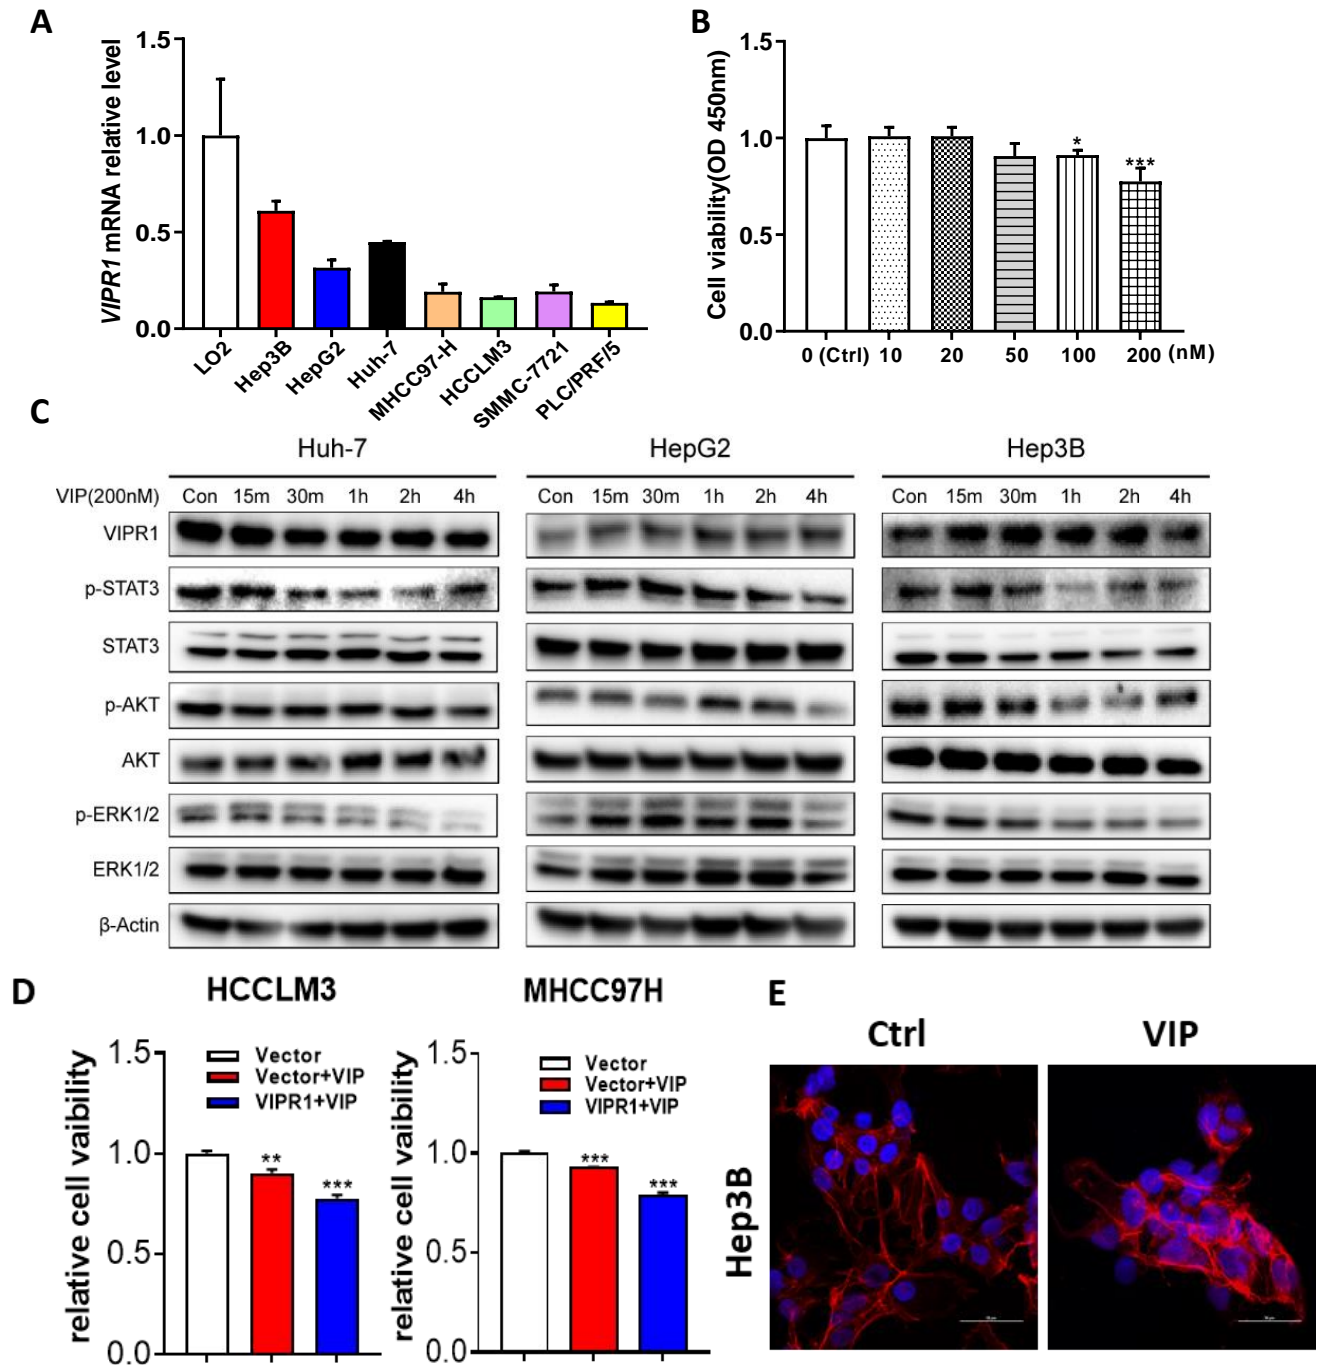

**Supporting Fig. S2. Activation of VIP/VIPR1 signaling suppresses oncogenic signaling pathway and HCC growth.** (A) *VIPR1* mRNA measurement in human hepatocyte cell line (LO2) and different human HCC cell lines. (B) Cell viability change after VIP treatment *in vitro* for 24 hours with different concentrations (0, 10nM, 20nM, 50nM, 100nM, 200nM). (C) Phosphorylation of STAT3, AKT, and ERK1/2 were partially inhibited after 200nM VIP treatment *in vitro*. (D) CCK8 assay for VIP/VIPR1 activated HCCLM3 and MHCC97H cells. (E) Representative micrographs of Phalloidin staining for cytoskeletal structure in Ctrl and VIP treated Hep3B cells. Blue: DAPI; Red: F-Actin. Values represent means $\pm$ SEM. \* $P < 0.05$ , \*\* $P < 0.01$ , \*\*\* $P < 0.001$ .

# Supporting Fig. S3

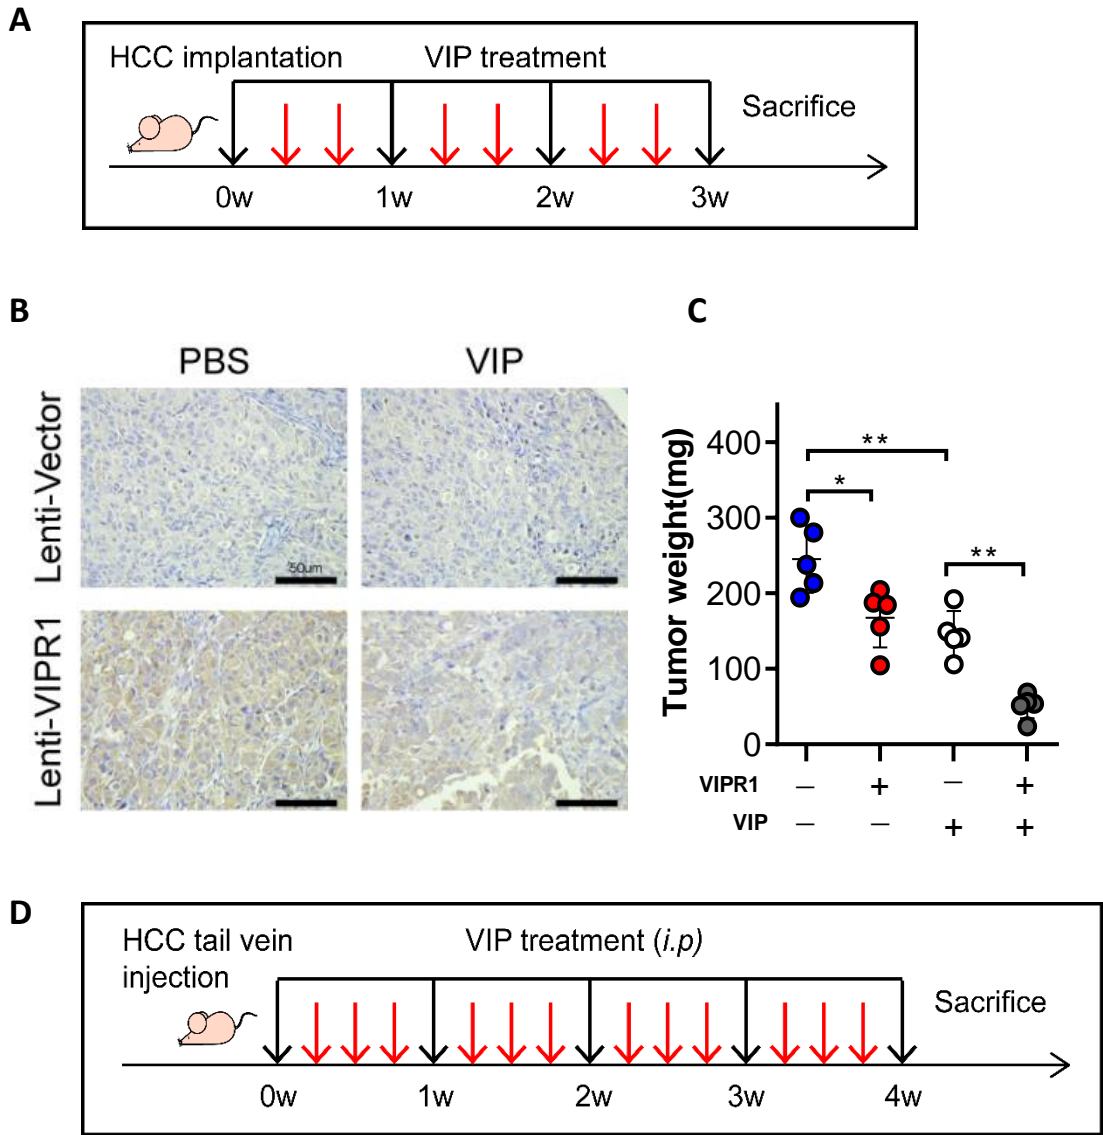

**Supporting Fig. S3. VIP treatment inhibits HCC growth and metastasis *in vivo*.** **(A)** The scheme shows that nude mice with HCC xenografts were treated with VIP twice per week (i.v., 300ug/kg). The mice were sacrificed 3 weeks later. **(B)** Representative micrographs of VIPR1 staining in HCCLM3-VIPR1 (overexpression group) and HCCLM3-Vector cells (Ctrl group). **(C)** Tumor weight (/mg) measurement in each group after sacrificing the mice. **(D)** Scheme for VIP *in vivo* treatment in metastatic model. In panels A and D, Red arrows mean VIP treatment, and black arrows indicate time points for sample collection. Values represent means $\pm$ SEM. \* $P$ < 0.05, \*\* $P$ < 0.01, \*\*\* $P$ < 0.001.

Supporting Fig. S4

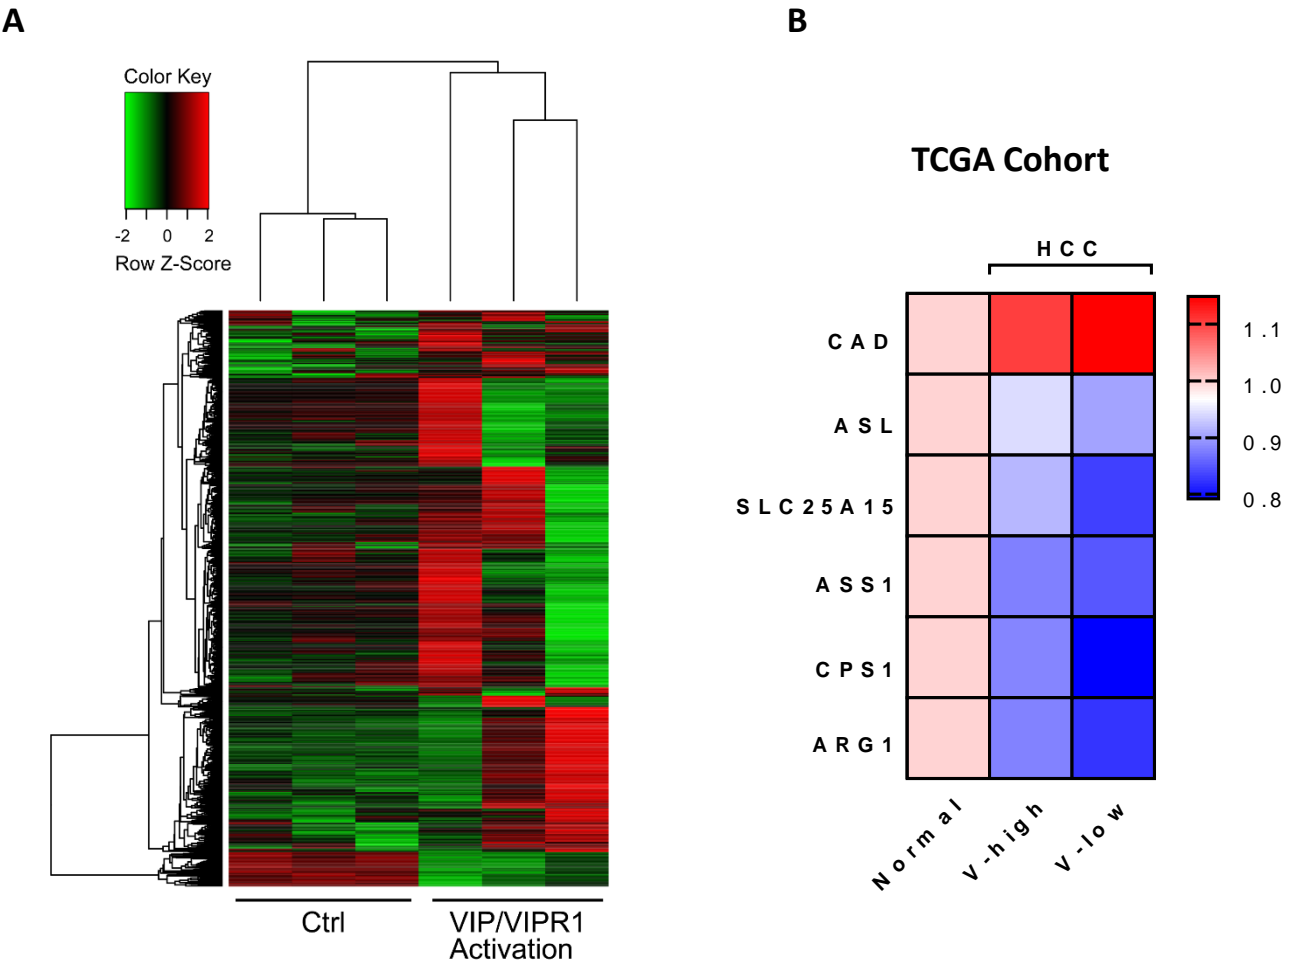

**Supporting Fig. S4. Transcriptional signature correlates with VIP/VIPR1 signal activation. (A)** Heatmap shows the alteration of transcriptional profiles after VIP/VIPR1 activation in Huh-7 cells. **(B)** Heatmap shows the difference of arginine metabolism-related genes expression in normal liver, VIPR1<sup>high</sup> and VIPR1<sup>low</sup> HCC of TCGA cohort.

## Supporting Fig. S5

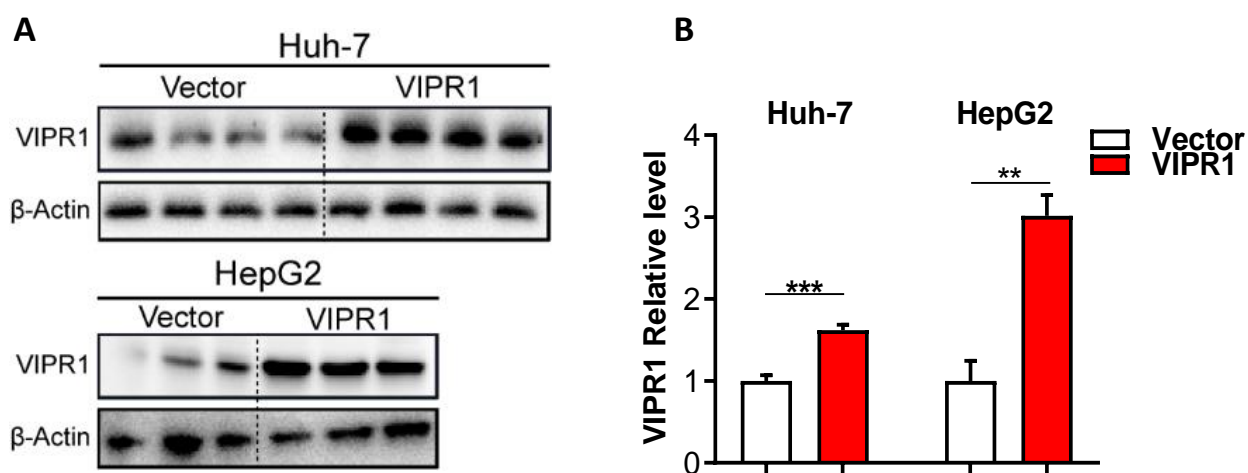

**Supporting Fig. S5.** Fold change of VIPR1 protein level after plasmid transfection in Huh-7 and HepG2 cells. (A). Protein level of VIPR1 were determined by performing western blot analysis. (B). Statistics of western blot results. Values represent means $\pm$ SEM. \*\* $P < 0.01$ , \*\*\* $P < 0.001$ .

# Supporting Fig. S6

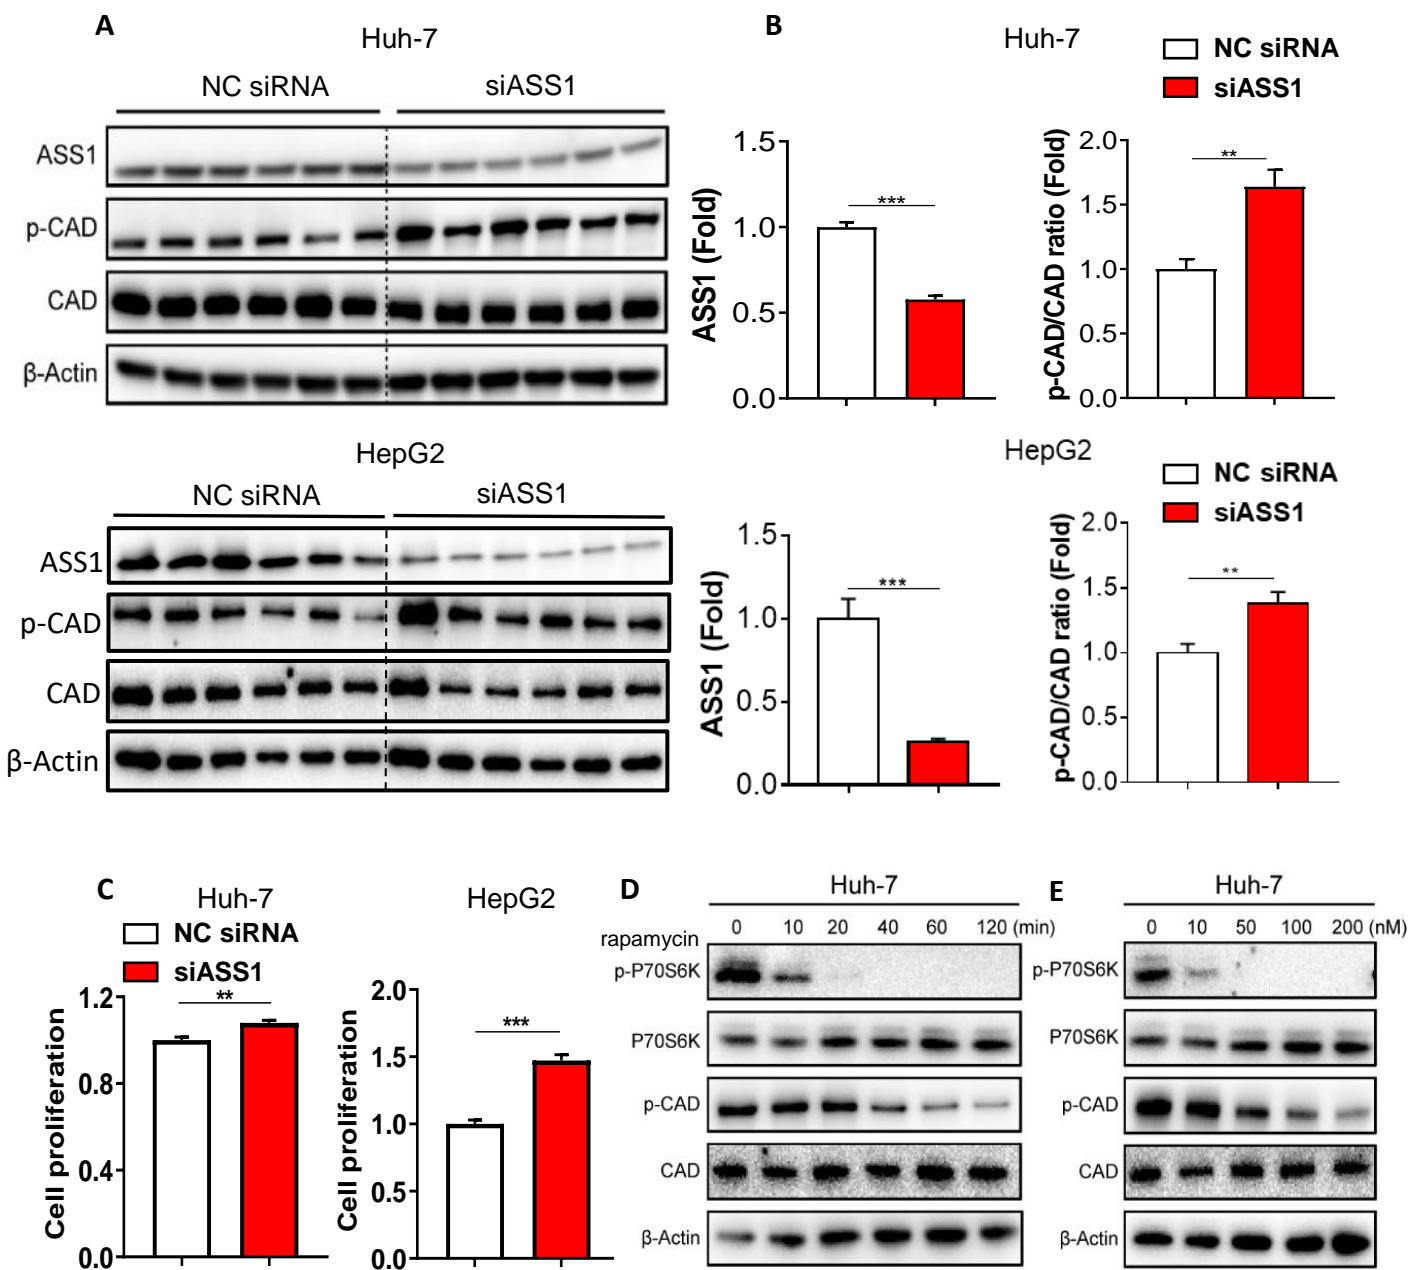

**Supporting Fig. S6. ASS1 reduction promotes HCC cell proliferation and upregulates CAD phosphorylation via the activation of mTOR/p70S6K pathway.** (A) Changes of ASS1 expression and p-CAD/CAD ratio in Huh-7 and HepG2 cells after ASS1 knockdown by siASS1 transfection. (B) Quantification of fold change for ASS1 and p-CAD/CAD ratio after siASS1 transfection in Huh-7 and HepG2 cells. (C) Fold change of cell proliferation in HepG2 cells (left) and Huh-7 cells (right) after siASS1 transfection. (D, E). Time- and dose-dependent manner of rapamycin treatment resulted decrease of CAD phosphorylation in Huh-7 cells (rapamycin concentration range: 0-200nM; duration: 0-120min). Values represent means $\pm$ SEM. \*\* $P$  < 0.01, \*\*\* $P$  < 0.001.

# Supporting Fig. S7

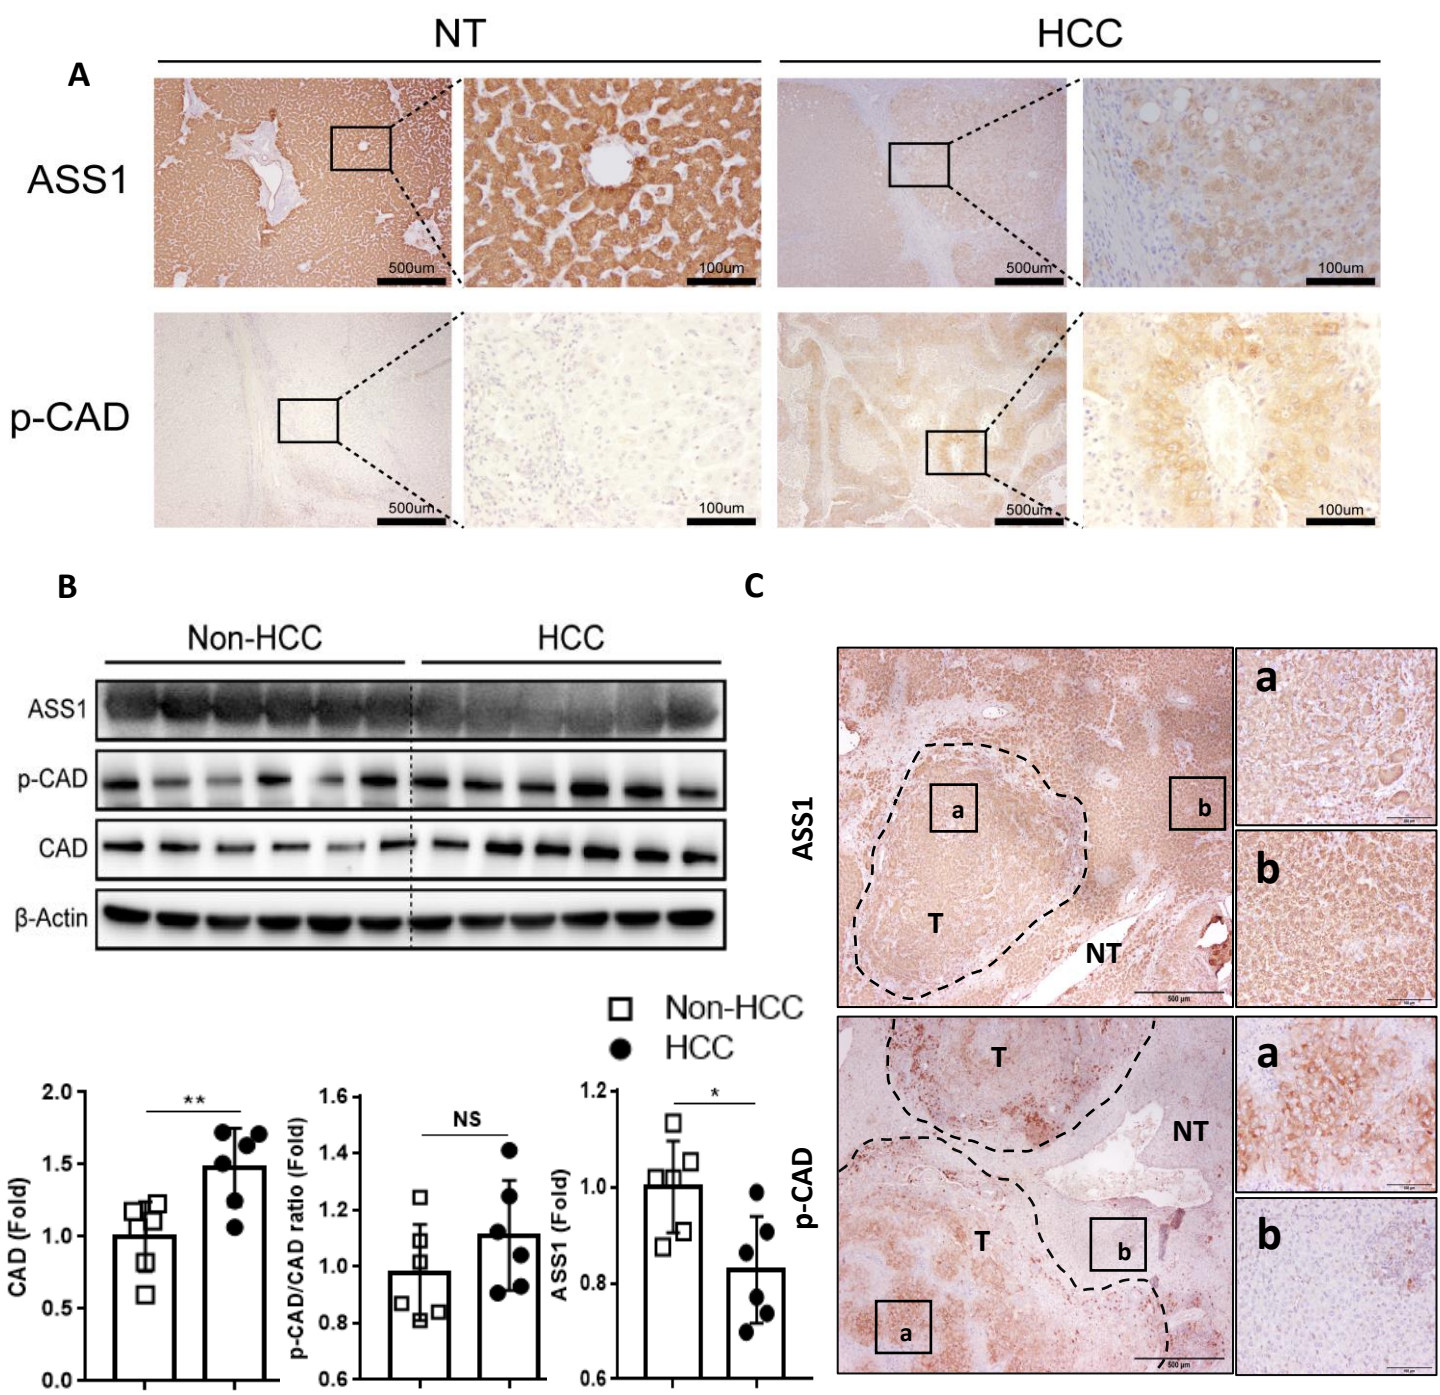

**Supporting Fig. S7 (A):** Representative IHC staining of ASS1 and p-CAD in human non-tumor liver and HCC tissue sections. **(B, C)** ASS1 and phosphorylated CAD (p-CAD) expression in DEN-induced HCC model. Protein levels of ASS1, total CAD and p-CAD in HCC tissues (n=6) and non-HCC liver tissues (n=6). Representative images of ASS1 and p-CAD in mouse HCC sections. The specific areas in tumor region (labeled 'T') surrounded by dotted line and non-tumorous region (labeled 'NT') are enlarged in 'a' and 'b'. Values represent means ± SEM. \*P < 0.05, \*\*P < 0.01.

## **Supplementary Materials and Methods**

### **Human Cohort Study**

A 107-patient cohort diagnosed with hepatocellular carcinoma (HCC) was enrolled in our study for investigating the significance of VIPR1 in HCC clinical prognosis. All HCC patients received surgical resection in Xiangya Hospital during 2005-2019. Human samples were obtained under informed consent. The clinicopathological characteristics, including age, gender, pathology, tumor size, tumor multiplicity, cirrhosis, vascular invasion and differentiation status, were available for all patients. Diagnosis of HCC and non-tumor adjacent liver tissues were confirmed based on histological findings by independent pathologists. The assessment of HCC tumor burden after surgery and treatment was guided by RECIST version 1.1 Criteria. Frozen specimens at -80°C of non-tumor adjacent liver tissue (liver tissue close to the tumorous region) and HCC tissues were used to extract total RNA and protein for analyses. Serum samples of HCC patients were collected before surgery and were used to measure urea concentration by using the Urea Assay kit (Abcam, ab83362). Paraffin-embedded surgical tissues (non-tumor liver and HCC tissues) were used for immunohistochemistry analyses. The information for all HCC cohorts enrolled in this study are listed in **Table S1-Table S6**.

### **RNA isolation and quantitative reverse transcription PCR (RT-qPCR)**

Total RNA was extracted from liver tissues and cell samples using TRIzol reagent (Invitrogen, Carlsbad, CA) following the manufacturer's instruction. One microgram (1µg) RNA was reverse-transcribed into cDNA by using High Capacity cDNA Reverse Transcription kit (Thermo Fisher Scientific). RT-qPCR was performed by SYBR Green Realtime PCR master mix. The mRNA levels were measured by QuantStudio™ 6 Real-Time PCR System (278861830; Thermo Fisher Scientific). The expression levels of target genes were normalized to GAPDH (for human genes) and 18S rRNA (For mouse genes) expression. Comparative Ct ( $2^{-\Delta\Delta Ct}$ ) method was performed to quantify the mRNA expression level. All primers used for RT-qPCR are listed in **Table S7**.

### **Western Blotting**

Liver tissues or cell lysates were homogenized in RIPA lysis buffer containing cocktail of protease inhibitors (Santa Cruz, CA) according to the manufacturer's instruction at 4°C and centrifuged at 10,000 g for 10 minutes. Protein extracts were quantified using BCA Protein Assay Kit (Thermo Fisher, Waltham, MA, USA), mixed with loading buffer, and then were subjected to 4-12% Bis-Tris protein gels (Bio-Rad, Hercules, CA, USA) and transferred to nitrocellulose membranes (Thermo

Fisher, Waltham, MA, USA). Protein bands were visualized with SuperSignal West Femto Maximum Sensitivity Substrate (Thermo Fisher, Waltham, MA, USA). Primary antibodies against proteins of interest are listed in **Table S8**. Secondary horseradish peroxidase-conjugated antibodies (Santa Cruz Biotechnology, Dallas, TX, USA) were used.

### **Cell culture and *in vitro* treatment**

Human hepatocyte cell line LO2 and human hepatocellular carcinoma cell lines (including: MHCC97H, HCCLM3, SMMC-7721, PLC/PRF/5) were purchased from The American Type Culture Collection (ATCC) and Biotech company (Zhong Qiao Xin Zhou Biotechnology Co.,Ltd., Shanghai, China). Another 3 human hepatocellular carcinoma cell lines, including HepG2, Hep3B, Huh-7, were kindly provided by Dr. Hongbing Wang, University of Maryland. Hep3B cells were cultured in a mixture of Minimum Essential Medium, 10% fetal bovine serum and penicillin-streptomycin. Other cell lines were cultured in the complete medium composed of Dulbecco's modified Eagle's medium, 10% fetal bovine serum and penicillin-streptomycin (all from Thermo Fisher Scientific, Waltham, MA, USA). Cells underwent short-term starvation (2hrs) were *in vitro* treated with VIP (human, rat, mouse, rabbit, canine, porcine) (1911/1; Tocris) at a final concentration of 200nM in routine culture conditions. In mechanistic study, Rapamycin (PHZ1235, Thermo Fisher Scientific) diluted in DMSO were used to treat cells at the specific concentration (0nM, 10nM, 50nM, 100nM, 200nM were used).

### **Cell counting kit-8 (CCK-8) assay**

*In vitro* cell proliferation and viability were determined by colorimetric method by using Cell counting kit-8 (CCK-8) assay (Cat # DJDB4000X, VitaScientific) according to the manufacturer's instruction. Cell viability was presented as absorbance value at 450nm. Cell proliferation was monitored at 4 different timepoints during consecutive 3 days. Similar method was previously described in [1].

### **Colony formation assay and Wound healing assay**

These two assays were used to determine HCC cell proliferation and migration potential *in vitro*, which were performed as described previously [1, 2]. All experiments were performed in triplicate. The MHCC97H and HCCLM3 cells were seeded in 6-well plates and were cultured in the routine condition. 200 uL tips were used for the wound healing when the cell confluency was above 90%. Then the cells were washed with PBS and cultured with a low concentration of serum. Photos were taken at two timepoints (0h, 24h) and statistically analyzed by using ImageJ software (National Institutes of Health, Bethesda, MD).

### **Plasmid and siRNA transfection**

VIPR1 was a gift from Gavin Wright (Addgene plasmid # 51865; <http://n2t.net/addgene:51865>; RRID:Addgene\_51865). Transient plasmid transfection was performed with Lipofectamine 3000 reagent according to the manufacturer's instruction (Invitrogen, USA). siRNA targeting ASS1 (siASS1) (P/N: AM51331; Lot# ASO2GXJ2 ; siRNA ID#:117838) and its negative control siRNA (Silencer™ Negative Control No. 2 siRNA; Catalog#: AM4613) were purchased from Thermo Fisher Scientific. siRNA transfection was performed with Lipofectamine RNAiMAX transfection reagent (Invitrogen, USA) following the manufacturer's instruction. The transfection efficiency was confirmed by performing Western Blotting.

### **Lentivirus infection**

The lentiviral vector GV358 (Ubi-MCS-3FLAG-SV40-EGFP-IRES-Puromycin) containing human VIPR1 (NM\_004624) and its Control vector, and lentiviral vector GV260 (Ubi-MCS-firefly\_Luciferase-IRES-Puromycin) for bioluminescent imaging analysis were constructed from Shanghai GeneChem, China. Cell infection was performed according to the manufacturer's instruction. To select stably transduced cell clones, the infected cells were cultured with puromycin (2.5ug/mL) for 2 weeks; RT-qPCR was then performed to determine the overall infection efficiency.

### **Urea concentration measurement**

Urea Assay Kit (ab83362, Abcam) was used to measure the urea concentration in HCC serum samples and cell culture medium according to the manufacturer's instruction. The samples should be diluted by 1xPBS to a proper concentration range for analysis. The standards added to 96-well plates were used for plotting standard curve. Urea in samples was acted on by enzymes to form a product; the reaction mixture was incubated at 37°C for 1h, and measured the absorbance by using microplate reader (ODmax=570nm). Absorbance is directly proportional to the urea concentration in the system.

### **Immunohistochemistry (IHC) and hematoxylin and eosin (H&E) staining**

Paraffin-embedded tissues were used for immunohistochemistry staining. 4-μm-thick paraffin sections were stained with hematoxylin and eosin (H&E) for histological analysis. For IHC staining, heat-induced epitope retrieval was carried in 3% citrate buffer, endogenous peroxidases were blocked with 3% H<sub>2</sub>O<sub>2</sub> for 20 minutes, and non-specific binding was blocked by using 3% normal goat serum for 1 hour at room temperature. Slides were then incubated with primary antibody overnight at 4°C. After PBS washing, slides were subsequently incubated with anti-mouse or anti-rabbit secondary antibodies (SignalStain® Boost IHC Detection Reagent, Cell Signaling Technology, Danvers, MA, USA) for 1 hour at room temperature. Staining results were developed and visualized by Vectastain Elite ABC Staining Kit DAB peroxidase substrate kit (Vector Laboratories, Inc., Burlingame, CA) according to the

manufacturer's instruction, and then slides were counterstained with hematoxylin. The analysis of positive area was determined with ImageJ software (National Institutes of Health, Bethesda, MD).

### **Immunofluorescent staining for adherent cells**

Cell adherent sections were fixed in 4% paraformaldehyde (4% PFA, pH7.4) for 10 minutes and washed with PBS three times. Slides were blocked in blocking solution (3% bovine serum albumin in PBS) for 1 hour at room temperature and incubated with primary antibodies (listed in **Table S8**) overnight at 4°C. After PBS washing, slides were incubated with the fluorescence conjugated antibodies (listed in **Table S8**) for 1 hour at room temperature. Nuclear staining was obtained by incubation with 1 mg/mL 4', 6'-diamino-2-phenylindole (DAPI) for 5 min at room temperature. Images were acquired using LSM 710 confocal microscope (Zeiss, Thornwood, NY, USA). The images were analyzed by the con-focal microscopic system from Zeiss (Thornwood, NY).

### **HCC tumor cell derived xenograft (CDX) model**

The method for building HCC cell derived xenograft (CDX) model was discussed in Methods and materials and figure legends of the main text. Tumor size was measured every 3 days. Tumor volume was calculated by using the following formula: volume =  $1/2 \times (\text{length} \times \text{width}^2)$ . All mice were sacrificed at day 21. Tumor tissues were isolated and embedded in paraffin for Ki-67 (AY0064, ABZOOM) staining and analysis.

### ***In vivo* bioluminescent imaging on metastatic model**

Bioluminescence imaging (BLI) method was utilized to visualize and quantify bioluminescent signal of metastatic HCC in mouse model (OD-Prkdcem26Cd52Il2rgem26Cd22/Nju (NOD/SCID IL2rg<sup>-/-</sup> mice, or NCG mice; Nanjing Biomedical Research Institute of Nanjing University). Luciferase Vector GV260 (Ubi-MCS-firefly\_Luciferase-IRES-Puromycin) labeled HCCLM3 cells was injected via tail vein (More details are mentioned in main text). The mice were anaesthetized under 2% isoflurane gas, then were intraperitoneally injected with D-Luciferin (Sodium Salt D 40901ES01, YEASEN, China), and were imaged 10-15 minutes after the injection in an IVIS imaging system (IVIS® In Vivo Imaging Systems, Spectrum BL; PerkinElmer, MA) according to the manufacturer's instruction under anesthesia. BLI signal is quantified in regions of interest (ROIs). Images were analyzed by using Living Image 4.3.1 software (PerkinElmer, MA). Metastatic lesions were measured once a week after model establishment, over the next 4 weeks. After sacrificing the mice, spleen, liver and lung tissues were isolated and measured to quantify the metastases. The targeted organs were collected and fixed in formalin, and embedded in paraffin for H&E staining.



## References

- [1]. Niu W, Luo Y, Zhou Y, Li M, Wu C, Duan Y, et al. BRD7 suppresses invasion and metastasis in breast cancer by negatively regulating YB1-induced epithelial-mesenchymal transition. *J Exp Clin Cancer Res.* 2020;39(1):30.
  
- [2]. Xue Z, Zhao J, Niu L, An G, Guo Y, Ni L. Up-Regulation of MiR-300 Promotes Proliferation and Invasion of Osteosarcoma by Targeting BRD7. *PLoS One.* 2015;10(5):e0127682.

**Table S1. Clinical information and *VIPRI* level of HCC patients for waterfall plot analysis**

| Patient No. | Gender | Age | Etiology | <i>VIPRI</i><br>relative<br>expression | Change of<br>tumor size<br>( % ) |
|-------------|--------|-----|----------|----------------------------------------|----------------------------------|
| 1           | M      | 54  | HBV      | 0.004                                  | -58.9                            |
| 2           | M      | 53  | HBV      | 0.006                                  | 55.2                             |
| 3           | M      | 47  | HBV      | 0.006                                  | -100.0                           |
| 4           | M      | 40  | HBV      | 0.009                                  | 40.0                             |
| 5           | M      | 69  | HBV      | 0.01                                   | 27.3                             |
| 6           | F      | 45  | HBV      | 0.01                                   | -13.8                            |
| 7           | F      | 53  | HBV      | 0.01                                   | 41.7                             |
| 8           | M      | 49  | HBV      | 0.01                                   | 16.7                             |
| 9           | M      | 61  | HBV      | 0.016                                  | 63.6                             |
| 10          | F      | 55  | HBV      | 0.018                                  | -17.4                            |
| 11          | M      | 38  | HBV      | 0.018                                  | 30.0                             |
| 12          | M      | 67  | HBV      | 0.019                                  | 52.4                             |
| 13          | M      | 39  | HBV      | 0.021                                  | 43.8                             |
| 14          | M      | 41  | HBV      | 0.024                                  | 30.0                             |
| 15          | F      | 38  | HBV      | 0.025                                  | 81.8                             |
| 16          | M      | 30  | HBV      | 0.026                                  | 8.7                              |
| 17          | M      | 49  | HBV      | 0.026                                  | 26.7                             |
| 18          | M      | 34  | HBV      | 0.03                                   | 137.5                            |
| 19          | F      | 54  | HBV      | 0.031                                  | 35.7                             |
| 20          | M      | 52  | HBV      | 0.031                                  | 123.3                            |
| 21          | M      | 53  | HBV      | 0.037                                  | 14.3                             |
| 22          | M      | 52  | HBV      | 0.045                                  | 19.0                             |
| 23          | M      | 47  | HBV      | 0.047                                  | -7.7                             |
| 24          | M      | 59  | HBV      | 0.047                                  | 20.0                             |

|    |   |    |              |       |        |
|----|---|----|--------------|-------|--------|
| 25 | M | 64 | HBV          | 0.057 | -10.7  |
| 26 | M | 75 | HBV          | 0.067 | 44.1   |
| 27 | M | 58 | HCV          | 0.071 | 33.3   |
| 28 | M | 63 | HBV          | 0.077 | -57.1  |
| 29 | M | 46 | HBV          | 0.079 | 36.4   |
| 30 | M | 53 | HBV          | 0.08  | 12.2   |
| 31 | M | 51 | HBV          | 0.083 | -100.0 |
| 32 | M | 59 | HBV          | 0.127 | 108.3  |
| 33 | M | 49 | HBV          | 0.143 | -23.0  |
| 34 | M | 62 | HBV          | 0.162 | 5.0    |
| 35 | M | 52 | HBV          | 0.216 | 17.6   |
| 36 | F | 73 | Others       | 0.227 | -23.5  |
| 37 | M | 50 | HBV          | 0.285 | -100   |
| 38 | M | 65 | HBV          | 0.393 | 27.5   |
| 39 | M | 43 | HCV; Alcohol | 0.473 | -52.2  |
| 40 | M | 32 | HBV          | 0.484 | 76.2   |
| 41 | M | 55 | HBV          | 1     | 27.3   |
| 42 | M | 58 | HBV          | 2.068 | -40.0  |
| 43 | M | 51 | Others       | 2.777 | 10.4   |
| 44 | M | 48 | HBV          | 3.659 | -47.5  |

---

**Table S2. Clinical parameters of HCC patients for RT-qPCR analysis of Urea cycle related genes**

| Patient No. | Gender | Age | Etiology     | AFP (ng/mL) |
|-------------|--------|-----|--------------|-------------|
| 1           | M      | 58  | HCV          | 6.09        |
| 2           | F      | 54  | HBV          | 4.31        |
| 3           | M      | 54  | HBV          | 645.80      |
| 4           | M      | 69  | HBV          | 736.45      |
| 5           | M      | 65  | HBV          | 6.10        |
| 6           | M      | 59  | HBV          | 7.28        |
| 7           | M      | 30  | HBV          | 8.28        |
| 8           | F      | 45  | HBV          | 10890.00    |
| 9           | M      | 67  | HBV          | 29.60       |
| 10          | M      | 52  | HBV          | 109.60      |
| 11          | M      | 64  | HBV          | 4.77        |
| 12          | M      | 61  | HBV          | 30.82       |
| 13          | M      | 34  | HBV          | 1.29        |
| 14          | M      | 39  | HBV          | 800.00      |
| 15          | M      | 56  | Others       | 8.34        |
| 16          | M      | 52  | Others       | 1210.00     |
| 17          | F      | 61  | Others       | 4.08        |
| 18          | M      | 52  | HBV          | 2.21        |
| 19          | M      | 75  | Others       | 3.71        |
| 20          | M      | 53  | HBV          | 5.67        |
| 21          | M      | 46  | HBV          | 5.27        |
| 22          | M      | 48  | HBV          | 1210.00     |
| 23          | M      | 43  | HCV; Alcohol | 1.94        |
| 24          | F      | 40  | HBV          | 759.80      |

**Table S3. Clinical information of HCC patients for urea concentration test**

| Variables                    |            | High VIPR1 Group<br>(n=17) | Low VIPR1 Group<br>(n=18) | P value |
|------------------------------|------------|----------------------------|---------------------------|---------|
| Age (years)                  |            | 50.59 ± 3.151              | 52.83 ± 2.041             | 0.5494  |
| Gender, n (%)                | Male       | 15 (88.2)                  | 15 (83.3)                 | >0.9999 |
|                              | Female     | 2 (11.8)                   | 3 (16.7)                  |         |
| AFP, n (%)                   | ≥100ng/ml  | 10 (58.8)                  | 12 (66.7)                 | 0.7332  |
|                              | <100ng/ml  | 7 (41.2)                   | 6 (33.3)                  |         |
| Child-Pugh classification    | A          | 14 (82.4)                  | 14 (77.8)                 | >0.9999 |
|                              | B+C        | 3 (17.6)                   | 4 (22.2)                  |         |
| Liver cirrhosis, n (%)       | Y          | 8 (47.1)                   | 14 (77.8)                 | 0.0858  |
|                              | N          | 9 (52.9)                   | 4 (22.2)                  |         |
| Tumor differentiation, n (%) | Well       | 6 (35.3)                   | 2 (11.1)                  | 0.1661  |
|                              | Moderately | 11 (64.7)                  | 15 (83.3)                 |         |
|                              | Poorly     | 0 (0)                      | 1 (5.6)                   |         |

**Table S4. Clinical data of HCC patients for ROC curve analysis**

| Patient No. | Gender | Age | Etiology      | VIPR1 relative expression | AFP (ng/mL) | Urea (mmol/L) | Relapse |
|-------------|--------|-----|---------------|---------------------------|-------------|---------------|---------|
| 1           | M      | 49  | HBV           | 0.143                     | 244.89      | 3.75          | Y       |
| 2           | M      | 65  | HBV           | 0.393                     | 6.1         | 5.50          | N       |
| 3           | F      | 45  | HBV           | 0.01                      | 10890       | 3.48          | Y       |
| 4           | M      | 52  | HBV           | 0.031                     | 109.6       | 6.70          | Y       |
| 5           | M      | 53  | HBV           | 0.006                     | 137.3       | 2.20          | Y       |
| 6           | M      | 39  | HBV           | 0.021                     | 800         | 4.78          | Y       |
| 7           | M      | 52  | HBV           | 0.045                     | 2.21        | 4.16          | N       |
| 8           | M      | 43  | HCV, Alcohol  | 0.473                     | 1.94        | 3.76          | N       |
| 9           | M      | 59  | HBV           | 0.047                     | 12.83       | 4.59          | N       |
| 10          | F      | 50  | Others        | 0.143                     | 3.49        | 2.71          | Y       |
| 11          | M      | 32  | HBV           | 0.484                     | 499.23      | 3.19          | N       |
| 12          | M      | 52  | HBV           | 0.231                     | 7.69        | 6.01          | Y       |
| 13          | M      | 46  | HBV           | 0.079                     | 1210        | 7.15          | Y       |
| 14          | M      | 63  | HBV           | 0.077                     | 5.32        | 3.32          | Y       |
| 15          | M      | 62  | Alcohol       | 0.294                     | 1210        | 6.13          | N       |
| 16          | F      | 37  | HBV           | 0.041                     | 1210        | 2.52          | Y       |
| 17          | M      | 42  | HBV           | 0.086                     | 1.13        | 5.13          | N       |
| 18          | F      | 56  | HBV           | 0.143                     | 1210        | 2.93          | Y       |
| 19          | M      | 41  | HBV           | 0.024                     | 1.24        | 4.01          | Y       |
| 20          | M      | 60  | Alcohol       | 0.417                     | 1.92        | 3.97          | N       |
| 21          | M      | 51  | HBV           | 0.092                     | 800         | 4.96          | N       |
| 22          | M      | 57  | HBV           | 0.146                     | 4.55        | 5.00          | N       |
| 23          | M      | 53  | HBV , Alcohol | 0.007                     | 108.6       | 6.40          | Y       |
| 24          | M      | 67  | HBV           | 0.115                     | 4.27        | 8.21          | N       |
| 25          | F      | 53  | HBV           | 0.08                      | 1210        | 3.05          | Y       |
| 26          | M      | 70  | HBV           | 0.521                     | 15.88       | 3.72          | N       |
| 27          | M      | 51  | HBV           | 0.083                     | 242.24      | 4.45          | Y       |
| 28          | M      | 50  | HBV           | 0.14                      | 7.41        | 4.00          | N       |
| 29          | M      | 56  | HBV           | 0.076                     | 5.26        | 3.37          | Y       |
| 30          | M      | 42  | HBV           | 0.15                      | 547.61      | 3.49          | N       |
| 31          | M      | 77  | HBV           | 0.012                     | 2.45        | 5.44          | N       |
| 32          | M      | 45  | HBV , Alcohol | 0.016                     | 191.15      | 2.10          | Y       |

|    |   |    |                  |       |         |      |   |
|----|---|----|------------------|-------|---------|------|---|
| 33 | F | 51 | HBV              | 0.079 | 1210    | 4.78 | Y |
| 34 | M | 47 | HBV ,<br>Alcohol | 0.014 | 1210    | 3.51 | Y |
| 35 | M | 56 | HBV              | 0.025 | 1.89    | 5.34 | N |
| 36 | F | 62 | Others           | 0.014 | 9.23    | 2.34 | Y |
| 37 | M | 49 | HBV              | 0.527 | 8.32    | 2.80 | Y |
| 38 | M | 39 | HBV              | 0.037 | 223.8   | 5.96 | Y |
| 39 | M | 26 | HBV              | 0.022 | 245.161 | 4.63 | Y |
| 40 | F | 69 | HBV              | 0.647 | 800     | 4.33 | N |
| 41 | M | 38 | HBV              | 0.186 | 1210    | 3.25 | Y |
| 42 | M | 45 | HBV              | 0.033 | 300     | 2.15 | Y |
| 43 | M | 50 | HBV ,<br>Alcohol | 0.571 | 1210    | 2.01 | Y |

**Table S5. Clinical information of HCC patients for p-CAD IHC staining analysis**

| Patient No. | Age | Gender | Etiology     | p-CAD Score | Relapse |
|-------------|-----|--------|--------------|-------------|---------|
| 1           | 58  | M      | HCV          | ++          | 0       |
| 2           | 54  | F      | HBV          | +           | 0       |
| 3           | 65  | M      | HBV          | +           | 0       |
| 4           | 53  | M      | HBV          | +++         | 0       |
| 5           | 30  | M      | HBV          | +++         | 0       |
| 6           | 64  | M      | HBV          | -           | 0       |
| 7           | 53  | F      | HBV          | +           | 0       |
| 8           | 52  | M      | HBV          | -           | 0       |
| 9           | 75  | M      | HBV          | +           | 0       |
| 10          | 43  | M      | HBV, Alcohol | ++          | 0       |
| 11          | 59  | M      | HBV          | ++          | 0       |
| 12          | 51  | M      | HBV          | +           | 0       |
| 13          | 49  | M      | HBV          | +           | 0       |
| C           | 71  | M      | HCV          | -           | 0       |
| D           | 66  | M      | HBV, Alcohol | +           | 0       |
| E           | 59  | M      | HCV          | +           | 0       |
| 17          | 55  | M      | HBV          | +           | 1       |
| 18          | 48  | M      | HBV          | +           | 1       |
| 19          | 54  | M      | HBV          | +++         | 1       |
| 20          | 45  | F      | HBV          | -           | 1       |
| 21          | 67  | M      | HBV          | +           | 1       |
| 22          | 52  | M      | HBV          | +           | 1       |
| 23          | 34  | M      | HBV          | +++         | 1       |
| 24          | 39  | M      | HBV          | ++          | 1       |
| 25          | 56  | M      | Others       | ++          | 1       |
| 26          | 52  | M      | Others       | +++         | 1       |
| 27          | 61  | F      | Others       | +++         | 1       |
| 28          | 46  | M      | HBV          | ++          | 1       |
| 29          | 48  | M      | HBV          | +++         | 1       |
| 30          | 73  | F      | Others       | ++          | 1       |
| 31          | 40  | F      | HBV          | ++          | 1       |
| 32          | 39  | M      | HBV          | ++          | 1       |
| 33          | 55  | M      | Others       | +           | 1       |
| 34          | 47  | M      | HBV          | +++         | 1       |
| A           | 48  | M      | HCV          | +++         | 1       |
| B           | 56  | M      | HCV          | ++          | 1       |

**Table S6. Clinical information of Spider plot analysis**

| Patient No. | Age | Gender | tumor size change (%) |       |       |       |      | VIPR1 expression |
|-------------|-----|--------|-----------------------|-------|-------|-------|------|------------------|
|             |     |        | 8w                    | 12w   | 24w   | 36w   | 48w  |                  |
| 1           | 55  | M      |                       |       | -55   | -90   | 27.3 | High             |
| 2           | 54  | M      |                       | -55.4 |       | -58.9 |      | Low              |
| 3           | 50  | M      |                       | 17.6  |       | -100  |      | High             |
| 4           | 32  | M      | -64                   |       | 148.7 | 112.4 | 76.2 | Low              |
| 5           | 46  | M      |                       | 20.5  | 36.4  |       |      | High             |
| 6           | 38  | F      |                       |       |       | 81.8  |      | Low              |
| 7           | 63  | M      |                       |       | -51.7 | -51.7 |      | High             |
| 8           | 49  | M      | -47.7                 |       | -47.5 |       |      | High             |
| 9           | 34  | M      |                       | 137.5 |       |       |      | Low              |
| 10          | 41  | M      |                       | 0     |       |       | 30   | Low              |
| 11          | 38  | M      |                       | 30    |       |       |      | Low              |
| 12          | 53  | M      | 2.4                   |       | -12.5 |       | 41.7 | Low              |
| 13          | 51  | M      |                       | 0     | -16.3 | -100  |      | High             |
| 14          | 40  | M      |                       | -10   | -20   | 40    |      | Low              |
| 15          | 53  | F      |                       |       |       |       | 12.2 | High             |
| 16          | 47  | M      | -100                  |       | -100  |       |      | High             |
| 17          | 49  | M      |                       | 16.7  |       | 16.7  |      | Low              |
| 18          | 26  | M      |                       | 26.7  | 26.7  |       |      | Low              |
| 19          | 48  | M      |                       |       | -4.8  | 52.4  |      | High             |

**Table S7. Primers used for RT-qPCR analysis**

| Gene                | Forward primer (5'–3')  | Reverse primer (5'–3')  |
|---------------------|-------------------------|-------------------------|
| <i>VIPRI</i> (H)    | CCCCTGGGTCAGTCTGGTG     | GAGACCTAGCATTCGCTGGTG   |
| <i>GAPDH</i> (H)    | GACCTGACCTGCCGTCTAGAAA  | CCTGCTTCACCACCTTCTTGA   |
| <i>Vipr1</i> (M)    | GATGTGGGACAACCTCACCTG   | TAGCCGTGAATGGGGGAAAAC   |
| 18s(M)              | AACTTTCGATGGTAGTCGCCGT  | TCCTTGGATGTGGTAGCCGTTT  |
| <i>ASS1</i> (H)     | CTTGGGGCCAAAAAGGTGTTC   | GAGGTAGCGGTCTCTACATACAG |
| <i>ASL</i> (H)      | CAGTGGACCCCATCATGGAGA   | GGCTTTGCTGCCTTGAACATC   |
| <i>CPS1</i> (H)     | AGGCCCATGCCACAAATCATCA  | GCCTGATGCCAGGTCTTGAA    |
| <i>OTC</i> (H)      | CGGCCCCGTGTATTGTCTAGC   | TAGCCAGGGTGTCCAAATCTG   |
| <i>SLC25A15</i> (H) | CCTGAAGACTTACTCCCAGGT   | GCGATGTTGGCGATTAGTGC    |
| <i>SLC25A13</i> (H) | TGGACTGTATAGAGGTCTGTTGC | CCCTCACAAAATCGTTCACTGT  |

Notes: 'H' means human, 'M' means mouse

**Table S8. Information of reagents used in the project**

| Reagent                                             | Cat No.    | Manufacturer              |
|-----------------------------------------------------|------------|---------------------------|
| VIPR1 (used for IHC)                                | 14878-1-AP | Proteintech               |
| VPAC1 (used for WB)                                 | AB2265     | Millipore                 |
| Ki-67                                               | AY0064     | ABZOOM                    |
|                                                     | 9027       | Cell Signaling Technology |
| Cyclin E                                            | 20808      | Cell Signaling Technology |
| Cyclin D1                                           | 2922       | Cell Signaling Technology |
| $\beta$ -Actin                                      | ab8227     | Abcam                     |
| Phospho-CAD (Ser1859)                               | 67235      | Cell Signaling Technology |
| CAD                                                 | 93925      | Cell Signaling Technology |
| ASS1                                                | 70720      | Cell Signaling Technology |
| P70S6K                                              | 2708       | Cell Signaling Technology |
| p-P70S6K(Thr389)                                    | 9234       | Cell Signaling Technology |
| Stat3                                               | 12640      | Cell Signaling Technology |
| Phospho-Stat3 (Tyr705)                              | 4113       | Cell Signaling Technology |
| Akt                                                 | 9272       | Cell Signaling Technology |
| Phospho-Akt (Ser473)                                | 4060       | Cell Signaling Technology |
| p44/42 MAPK                                         | 4695       | Cell Signaling Technology |
| Phospho-p44/42 MAPK                                 | 4376       | Cell Signaling Technology |
| Urea Assay Kit                                      | ab83362    | Abcam                     |
| Secondary antibodies for IF staining                | 4409       | Cell Signaling Technology |
|                                                     | 4412       | Cell Signaling Technology |
| Cell Counting Kit-8 (CCK-8)                         | DJDB4000X  | VitaScientific            |
| D-Luciferin, Sodium Salt                            | 40901ES01  | Yeasten                   |
| Avertin                                             | M2910      | Easycheck                 |
| VIP (human, rat, mouse, rabbit, canine,<br>porcine) | 1911/1     | Tocris                    |
